# Supplementary material for: High expression of the vacuole membrane protein 1 (VMP1) is a potential marker of poor prognosis in HER2 positive breast cancer
Source: PubMed Central journal article supplement (PMC6707546; doi:10.1371/journal.pone.0221413), 2019-08-23
Supplement: pone.0221413.s005.pdf [file pone.0221413.s005.pdf]

**S1 Table: Patient characteristics of cohort 2.**

| Characteristic        | n=277 (%)  |
|-----------------------|------------|
| Age (year)            |            |
| median (range)        | 60 (27-97) |
| Estrogen receptor     |            |
| positive              | 194 (70)   |
| negative              | 77 (28)    |
| unknown               | 6 (2)      |
| Progesterone receptor |            |
| positive              | 176 (63.5) |
| negative              | 94 (34)    |
| unknown               | 7 (2.5)    |
| HER2 status           |            |
| positive              | 55 (20)    |
| negative              | 217 (78)   |
| unknown               | 5 (2)      |
| Tumor size (mm)       |            |
| >20 mm                | 194 (70)   |
| ≤20 mm                | 82 (29.6)  |
| unknown               | 1 (0.4)    |
| Histological type     |            |
| IDC                   | 231(83)    |
| ILC                   | 30 (11)    |
| other                 | 16 (6)     |
| Nodal status          |            |
| positive              | 146 (53)   |
| negative              | 101 (36)   |
| unknown               | 30 (11)    |
| Histological grade    |            |
| 1                     | 31 (11)    |
| 2                     | 124 (45)   |
| 3                     | 107 (39)   |
| unknown               | 15 (5)     |
| Metastasis            |            |
| positive              | 65 (23.5)  |
| negative              | 210 (75.8) |
| unknown               | 2 (0.7)    |
