# Supplementary material for: High expression of the vacuole membrane protein 1 (VMP1) is a potential marker of poor prognosis in HER2 positive breast cancer
Source: PubMed Central journal article supplement (PMC6707546; doi:10.1371/journal.pone.0221413), 2019-08-23
Supplement: pone.0221413.s006.pdf [file pone.0221413.s006.pdf]

S2 Table: Amplification and correlation between DNA and mRNA of the gene partners that constitute the fusion genes.

| Gene    | Amplification (%) |      | Correlation (r) |       |
|---------|-------------------|------|-----------------|-------|
|         | Nordic            | TCGA | Nordic          | TCGA  |
| ANK3    | 0.29              | 2.8  | 0.20*           | 0.39* |
| CCDC170 | 0.6               | 1.9  | 0.07            | 0.03  |
| CCDC6   | 0.9               | 1.5  | 0.52*           | 0.66* |
| ESR1    | 0.29              | 2.5  | 0.04            | -0.05 |
| GATAD2B | 3.07              | 12.7 | 0.55*           | 0.54* |
| ITGB6   | 0                 | 0.9  | -0.01           | 0.15* |
| NUP210L | 0.92              | 12.9 | 0.01            | 0.16* |
| RBMS1   | 0.93              | 0.6  | NA              | 0.31* |
| RPS6KB1 | 6.97              | 10.9 | NA              | 0.83* |
| VMP1    | 7.4               | 10.7 | 0.45*           | 0.70* |

Listed above are the ten genes that constitute the five fusion genes that were found in common between breast tumors and breast cancer cell lines. The number of tumors in each cohort that had both DNA and mRNA as measured by comparative genomic hybridization (CGH) and microarrays, respectively, are: Nordic tumors, n = 337 and TCGA = 421. Amplification denotes the number of tumors that carried amplification of the gene in these cohorts. The Pearson correlation (r) was calculated between DNA and mRNA. \*Denotes a significant result,  $p < 0.05$ .
