# Supplementary material for: High expression of the vacuole membrane protein 1 (VMP1) is a potential marker of poor prognosis in HER2 positive breast cancer
Source: PubMed Central journal article supplement (PMC6707546; doi:10.1371/journal.pone.0221413), 2019-08-23
Supplement: pone.0221413.s008.pdf [file pone.0221413.s008.pdf]

**S4 Table. Correlation of VMP1 mRNA with clinicopathological characteristics of breast tumors in cohort 2**

| Characteristic         | n=277 | VMP1 mRNA level,<br>median (25 <sup>th</sup> , 75 <sup>th</sup> ) | p-value |
|------------------------|-------|-------------------------------------------------------------------|---------|
| Age                    |       |                                                                   |         |
| ≥ 50                   | 213   | -0.10 (-0.66, 0.42)                                               | 0.7     |
| < 50                   | 64    | -0.32 (-0.92, 0.68)                                               |         |
| Estrogen receptor      |       |                                                                   |         |
| positive               | 194   | -0.15 (-0.67, 0.45)                                               | 0.9     |
| negative               | 77    | -0.08 (-0.92, 0.42)                                               |         |
| unknown                | 6     |                                                                   |         |
| Progesterone receptor  |       |                                                                   |         |
| positive               | 176   | -0.21 (-0.70, 0.41)                                               | 0.4     |
| negative               | 94    | -0.08 (-0.80, 0.56)                                               |         |
| unknown                | 7     |                                                                   |         |
| HER2 status            |       |                                                                   |         |
| positive               | 55    | 0.27 (-0.39, 0.98)                                                | 0.004*  |
| negative               | 217   | -0.17 (-0.80, 0.39)                                               |         |
| unknown                | 5     |                                                                   |         |
| Receptors ER and ERBB2 |       |                                                                   |         |
| ER neg and HER2 neg    | 38    | -0.46 (-1.19, 0.10)                                               | 0.001*  |
| ER neg and HER2 pos    | 23    | 0.27 (0.39, 1.02)                                                 |         |
| ER pos and HER2 neg    | 133   | -0.36 (-0.84, 0.30)                                               |         |
| ER pos and HER2 pos    | 18    | 0.08 (-0.51, 0.93)                                                |         |
| Tumor size (mm)        |       |                                                                   |         |
| > 20                   | 194   | -0.08 (-0.64, 0.50)                                               | 0.05    |
| ≤ 20                   | 82    | -0.26 (-0.81, 0.32)                                               |         |
| unknown                | 1     |                                                                   |         |
| Histological type      |       |                                                                   |         |
| IDC                    | 231   | -0.09 (-0.76, 0.51)                                               | 0.3     |
| ILC                    | 30    | -0.41 (-0.72, 0.06)                                               |         |
| other                  | 16    | -0.11 (-0.64, 0.33)                                               |         |
| Nodal status           |       |                                                                   |         |
| positive               | 146   | -0.22 (-0.74, 0.47)                                               | 0.6     |
| negative               | 101   | -0.07 (-0.77, 0.50)                                               |         |
| unknown                | 30    |                                                                   |         |
| Histological grade     |       |                                                                   |         |
| 1                      | 31    | -0.35 (-0.82, 0.08)                                               | 0.04*   |
| 2                      | 124   | -0.11 (-0.64, 0.37)                                               |         |
| 3                      | 107   | -0.07 (-0.79, 0.83)                                               |         |
| unknown                | 15    |                                                                   |         |
| Metastasis             |       |                                                                   |         |
| positive               | 65    | 0.00 (-0.76, 0.5)                                                 | 0.7     |
| negative               | 210   | -0.12 (-0.65, 0.45)                                               |         |
| unknown                | 2     |                                                                   |         |

The table shows the median and the 25<sup>th</sup> and 75<sup>th</sup> percentiles. The p-value was calculated with log<sub>2</sub> normalized data using a t-test or ANOVA. \*Significant difference p < 0.05.
