# Supplementary material for: High expression of the vacuole membrane protein 1 (VMP1) is a potential marker of poor prognosis in HER2 positive breast cancer
Source: PubMed Central journal article supplement (PMC6707546; doi:10.1371/journal.pone.0221413), 2019-08-23
Supplement: pone.0221413.s009.pdf [file pone.0221413.s009.pdf]

**S5 Table. Correlation of VMP1 mRNA with clinicopathological characteristics of breast tumors in TCGA.**

| Characteristic        | n= 421 | VMP1 mRNA level,<br>median (25 <sup>th</sup> , 75 <sup>th</sup> ) | p-value              |
|-----------------------|--------|-------------------------------------------------------------------|----------------------|
| Age                   |        |                                                                   |                      |
| ≥ 50                  | 125    | 0.16(-0.49, 1.18)                                                 | 0.6                  |
| < 50                  | 296    | 0.23 (-0.86, 1.29)                                                |                      |
| Estrogen receptor     |        |                                                                   | 7x10 <sup>-6*</sup>  |
| positive              | 323    | 0.39 (-0.41, 1.34)                                                |                      |
| negative              | 92     | -0.43 (-0.99, 0.28)                                               |                      |
| unknown               | 6      |                                                                   |                      |
| Progesterone receptor |        |                                                                   | 0.008*               |
| positive              | 273    | 0.42 (-0.33, 1.33)                                                |                      |
| negative              | 141    | -0.31 (-0.87, 0.55)                                               |                      |
| unknown               | 7      |                                                                   |                      |
| HER2 status           |        |                                                                   | 0.003*               |
| positive              | 73     | 0.61 (-0.30, 1.85)                                                |                      |
| negative              | 215    | 0.14 (-0.57, 0.96)                                                |                      |
| unknown               | 133    |                                                                   |                      |
| Histological type     |        |                                                                   | 0.8                  |
| IDC                   | 360    | 0.22 (-0.50, 1.26)                                                |                      |
| ILC                   | 34     | 0.45 (-0.51, 1.22)                                                |                      |
| unknown               | 27     |                                                                   |                      |
| Nodal status          |        |                                                                   | 0.01*                |
| positive              | 206    | 0.07 (-0.69, 1.08)                                                |                      |
| negative              | 206    | 0.35 (-0.49, 1.32)                                                |                      |
| unknown               | 9      |                                                                   |                      |
| Subtype               |        |                                                                   | 2x10 <sup>-12*</sup> |
| Basal                 | 77     | -0.58 (-1.17, -0.22)                                              |                      |
| ERBB2                 | 40     | 0.58 (-0.30, 2.02)                                                |                      |
| Luminal A             | 210    | 0.38 (-0.47, 1.23)                                                |                      |
| Luminal B             | 89     | 0.68 (-0.30, 1.92)                                                |                      |
| Normal-like           | 4      | 0.36 (-0.29, 0.68)                                                |                      |
| unknown               | 1      |                                                                   |                      |

The table shows the median and the 25<sup>th</sup> and 75<sup>th</sup> percentiles. The p-value was calculated with normalized Z-scores (A\_23\_P129935) using a t-test or ANOVA. \*Significant difference p < 0.05.
