# Supplementary material for: High expression of the vacuole membrane protein 1 (VMP1) is a potential marker of poor prognosis in HER2 positive breast cancer
Source: PubMed Central journal article supplement (PMC6707546; doi:10.1371/journal.pone.0221413), 2019-08-23
Supplement: pone.0221413.s010.pdf [file pone.0221413.s010.pdf]

**S6 Table. Correlation of VMP1 mRNA with clinicopathological characteristics of breast tumors in METABRIC.**

| Characteristic        | n=1904 | VMP1 mRNA level,<br>median (25 <sup>th</sup> , 75 <sup>th</sup> ) | p-value                |
|-----------------------|--------|-------------------------------------------------------------------|------------------------|
| Age                   |        |                                                                   |                        |
| ≥ 50                  | 1493   | 0.18 (-0.52, 1.00)                                                | 0.7                    |
| < 50                  | 411    | 0.07 (-0.51, 0.97)                                                |                        |
| Estrogen receptor     |        |                                                                   |                        |
| positive              | 1459   | 0.24 (-0.48, 1.04)                                                | 0.01*                  |
| negative              | 445    | -0.04 (-0.69, 0.87)                                               |                        |
| Progesterone receptor |        |                                                                   |                        |
| positive              | 1009   | 0.16 (-0.51, 0.97)                                                | 0.5                    |
| negative              | 895    | 0.15 (-0.54, 1.05)                                                |                        |
| HER2 status           |        |                                                                   |                        |
| positive              | 236    | 0.97 (0.14, 2.20)                                                 | <2x10 <sup>-16</sup> * |
| negative              | 1668   | 0.07 (-0.61, 0.85)                                                |                        |
| Histological type     |        |                                                                   |                        |
| IDC                   | 1502   | 0.18 (-0.51, 1.05)                                                | 0.02*                  |
| ILC                   | 141    | -0.04 (-0.76, 0.73)                                               |                        |
| Other                 | 261    | 0.15 (-0.5, 0.99)                                                 |                        |
| Subtype               |        |                                                                   |                        |
| Basal                 | 199    | -0.38 (-1.02, 0.37)                                               | <2x10 <sup>-16</sup> * |
| ERBB2                 | 220    | 0.66 (-0.09, 1.65)                                                |                        |
| Luminal A             | 679    | 0.09 (-0.53, 0.78)                                                |                        |
| Luminal B             | 461    | 0.47 (-0.43, 1.26)                                                |                        |
| Normal-like           | 140    | 0.22 (-0.62, 1.02)                                                |                        |
| claudin-low           | 199    | 0.09 (-0.52, 0.91)                                                |                        |
| unknown               | 6      |                                                                   |                        |

The table shows the median and the 25<sup>th</sup> and 75<sup>th</sup> percentiles. The p-value was calculated with normalized Z-scores (Illumina Human v3 microarray) using a t-test or ANOVA. \*Significant difference p < 0.05.
